# Self-Consistent Estimation of Mislocated Fixations during Reading

Ralf Engbert\*, Antje Nuthmann<sup>‡</sup>

Department of Psychology, University of Potsdam, Potsdam, Germany

During reading, we generate saccadic eye movements to move words into the center of the visual field for word processing. However, due to systematic and random errors in the oculomotor system, distributions of within-word landing positions are rather broad and show overlapping tails, which suggests that a fraction of fixations is mislocated and falls on words to the left or right of the selected target word. Here we propose a new procedure for the self-consistent estimation of the likelihood of mislocated fixations in normal reading. Our approach is based on iterative computation of the proportions of several types of oculomotor errors, the underlying probabilities for word-targeting, and corrected distributions of landing positions. We found that the average fraction of mislocated fixations ranges from about 10% to more than 30% depending on word length. These results show that fixation probabilities are strongly affected by oculomotor errors.

Citation: Engbert R, Nuthmann A (2008) Self-Consistent Estimation of Mislocated Fixations during Reading. PLoS ONE 3(2): e1534. doi:10.1371/journal.pone.0001534

## INTRODUCTION

When you read these lines of text, you generate saccadic eye movements with an average rate of 3 to 4 per second [1] to enable efficient word processing in the center of the visual field (the fovea). Many words are skipped during reading, so that foveal processing is not necessary for all words, while some words need more than a single fixation, which causes refixations on the same word. For saccades, within-word landing positions (Fig. 1) show a pronounced peak near the word center [2], but distributions are rather broad and additionally modulated by word length as well as launch-site distance [3]. Landing position distributions can be approximated by normal distributions, however, these distributions are truncated at word boundaries, suggesting that some of the fixations observed experimentally on a particular word were in fact intended for an adjacent word [3]. Such fixations are mislocated due to saccadic errors.

Mislocated fixations pose an important problem for the analysis of eye-movement data in reading because of the possible decoupling of fixation location and attention [4]: In a dual-task paradigm which required a target-directed saccade in combination with a letter discrimination task, saccadic error pattern indicated that attention was more reliably directed to the cued target location than saccadic eye movements, because discrimination performance on cued target locations was better than performance on actual landing positions in trials with saccadic errors, where saccades failed to land on the cued target. This effect demonstrated that covert attention was more precisely directed to a cued target location than the saccade.

For eye movements in reading, this result implies that we might process a different word than the fixated word during a mislocated fixation. Following this argument, misguided saccades that undershot the intended target word could create parafoveal-on-foveal effects [5]. In such effects, properties of the upcoming word (e.g., word difficulty) modulate the fixation duration of the currently fixated word (for an overview see [6]). The quantitative contribution of mislocated fixations is, however, an unsolved research problem, because there is no straightforward technique to investigate mislocated fixations. First, due to the complexity of scanpaths in reading [1,7], mislocated fixations cannot be identified from subsequent corrective saccades, which might occur in response to mislocated fixations. Second, mislocated fixations are difficult to study under experimental control in the laboratory.

Here we propose a computational approach to the problem of mislocated fixations based on experimentally observed distributions of landing positions. The fraction of mislocated fixations can be estimated by extrapolation of experimentally observed landing distributions (Fig. 2a). The basic problem for such an approach is that experimental data of within-word fixation locations consist of both well-located (i.e., fixations intended for the realized target word) and mislocated fixations (i.e., fixations intended for adjacent words). The proportions of mislocated fixations as a function of within-word fixation position follows a U-shaped curve (Fig. 2b, red line) with higher probabilities of mislocated fixations near word boundaries [8] due to contributions from overlapping tails of the landing position distributions of adjacent words. We used numerical simulations of an oculomotor model (Fig. 2a) to estimate the proportion of mislocated fixations (see *Materials and Methods*). Simulations of this model permitted the direct computation of distributions of both mislocated and well-located fixations. Assuming that variance in landing positions is caused by oculomotor errors, we expect that distributions of well-located fixations (Fig. 2b, black line) show less variance than the original distributions of all fixations (green line), because the mislocated fractions near word boundaries are removed. A major complication for the estimation of the proportion of mislocated fixations is that these errors also bias probabilities for word skipings and

**Academic Editor:** Edwin Robertson, Harvard Medical School, United States of America

**Received August 29, 2007; Accepted January 7, 2008; Published February 6, 2008**

**Copyright:** © 2008 Engbert, Nuthmann. This is an open-access article distributed under the terms of the Creative Commons Attribution License, which permits unrestricted use, distribution, and reproduction in any medium, provided the original author and source are credited.

**Funding:** This work was supported by Deutsche Forschungsgemeinschaft (grants EN 471/2-1, KL 955/6-1, and KL 955/14-1).

**Competing Interests:** The authors have declared that no competing interests exist.

\* **To whom correspondence should be addressed.** E-mail: Ralf.Engbert@uni-potsdam.de

<sup>‡</sup> **Current address:** Department of Psychology, University of Edinburgh, Edinburgh, United Kingdom

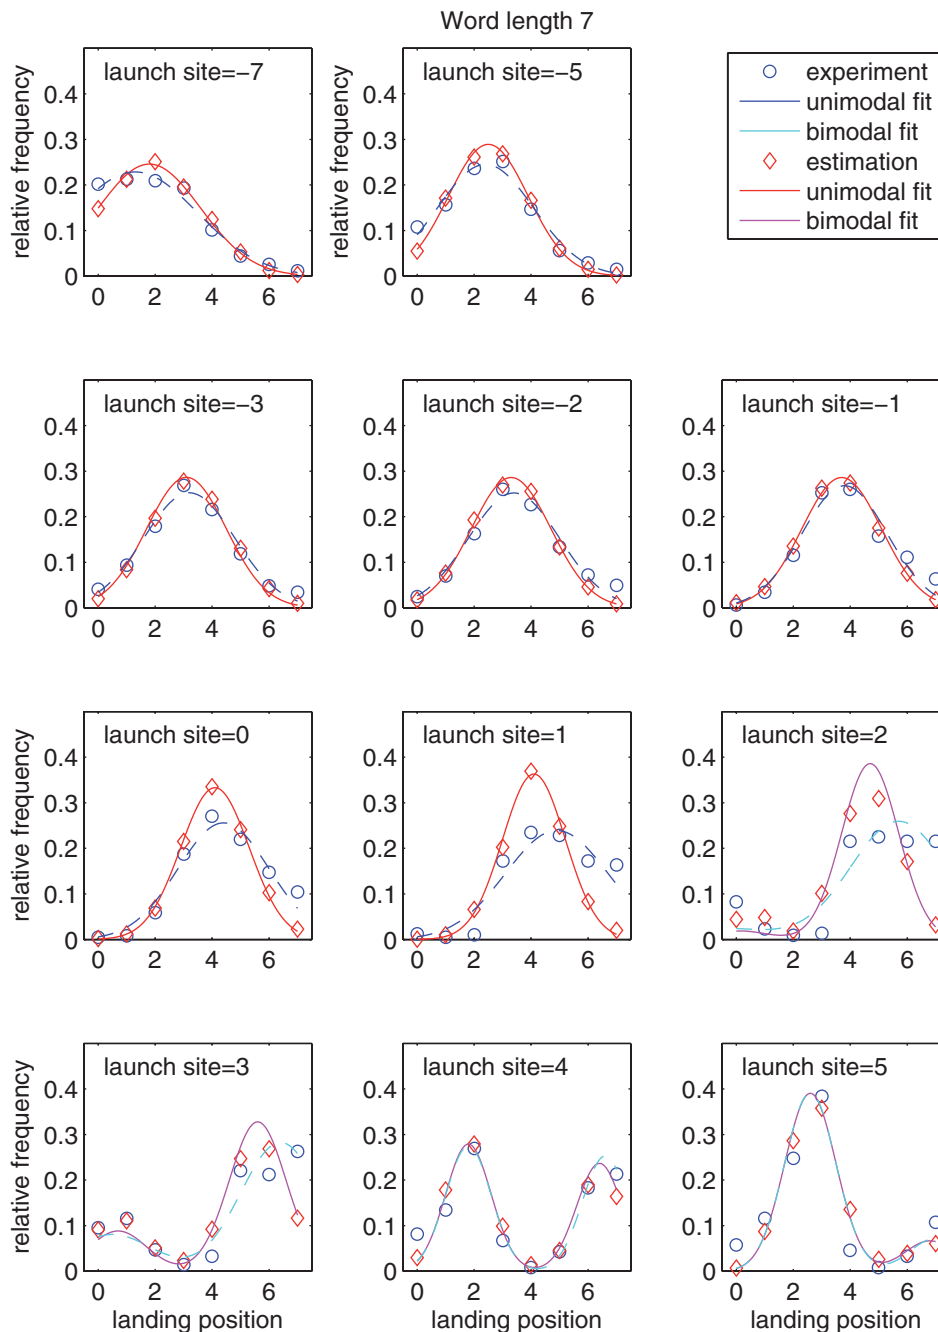

**Figure 1. Distributions of within-word landing positions for words of length 7 (as an example).** Letter position 0 is the space to the left of the word. Experimentally observed distributions (blue) are modulated by the distance of the launch site (the panels show distances between  $-7$  and  $5$ ). Positive launch sites indicate refixations of the same word, which often lead to bimodal distributions (e.g., launch site =  $3, 4$ ). Estimated distributions (red) show a reduced standard deviation due to subtraction of mislocated fixations. doi:10.1371/journal.pone.0001534.g001

refixations (Fig. 2c, red lines), such that simulated fixation probabilities deviate from the experimental data. As a solution to this problem, we developed an iterative procedure, where numerical simulations of saccade-targeting (Fig. 2a) were applied (i) to decompose the distributions of landing positions into well- and mislocated fixations (Fig. 2b) and (ii) to simultaneously adjust the probabilities for word-targeting, i.e., word skipings and refixations (Fig. 2c). Such an approach is self-consistent, because landing position distributions and word-targeting probabilities converge to numerical values consistent with self-generated errors.

The approach developed here represents a major improvement compared to our previously published work on mislocated fixations. In the first quantitative analysis of mislocated fixations, we estimated the proportions of mislocated fixation based on the assumption that each word (in serial order) is the target of a saccade [8]. Recently, we proposed an iterative procedure to compute the proportion a mislocated fixations from landing position data [9]. Both studies, however, were first-order approximations, because the (second-order) effect of mislocated fixations on fixation probabilities was neglected. For example, the

### A Oculomotor simulation: mislocated fixations

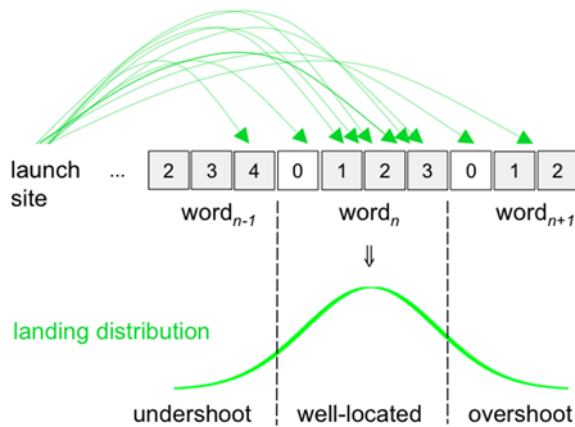

### B Correcting landing distributions

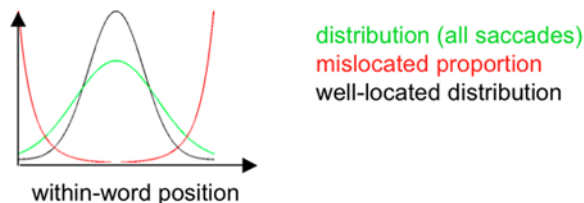

### C Adjusting probabilities for saccade target selection

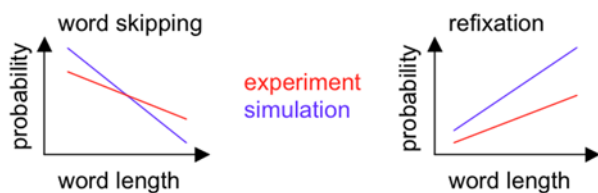

**Figure 2. Iterative procedure for the estimation of mislocated fixations.** Each iteration consists of three steps. (A) Oculomotor simulations are based on the parameters of the landing position distributions for a given launch site. Undershoot and overshoot of the target word generate mislocated fixations. (B) Landing position distributions are corrected by the amount of mislocated fixations as suggested by the simulations. (C) Mislocated fixations induce deviations from experimentally observed probabilities for word skipplings (left) and refixations (right), which are adjusted after each iteration. doi:10.1371/journal.pone.0001534.g002

general tendency to undershoot saccade targets will induce failed word skipplings. As a consequence, any type of eye-movement model must produce a higher intended skipping rate than the skipping rate observed in the experiments to reproduce the experimental data. In the present self-consistent (and iterative) approach, we will adjust the intended fixation probabilities after each iteration step of our simulations to estimate proportions of mislocated fixations which are consistent with the observed patterns of fixation probabilities produced by the oculomotor system (Fig. 2).

## MATERIALS AND METHODS

### Reading experiments

Eye-movement data from adult readers ( $N=230$ ; age range: 19 to 83 years) with normal or corrected-to-normal vision were

recorded. Participants received study credit or were paid 5 €. Following ten practice sentences, all participants read the Potsdam Sentence Corpus [6,10] comprising 144 single sentences and altogether 1138 words. Sentences were presented one at a time on a computer screen. The first and last fixations in a trial were excluded from the analyses. EyeLink I and II systems (SR Research, Osgoode, Canada) were used to measure a participant's gaze position with an absolute error of less than  $0.5^\circ$ , which corresponds approximately to letter size in our experiment. After preprocessing, data from 183,945 fixations were available. For more details on data preprocessing see [10].

### Oculomotor model

In a simple oculomotor model, we assumed that (i) fixation locations within words are drawn randomly from a word-length dependent landing-position distribution and that (ii) target words are selected according to a pre-defined set of word-length dependent probabilities for forward saccades, word skipplings, and refixations. For simplicity, we excluded regressions. The model initially starts with the fixation probabilities found in our experimental data. However, due to saccadic errors from assumption (i), saccades realized in the model will not exactly follow the pattern in the experimental data. Therefore, we implemented a simulation approach with iterative update of intended fixation probabilities in the oculomotor model.

### Numerical simulations

For oculomotor simulations (Fig. 2a), parameters of (launch-site and word length contingent) distributions of within-word fixation positions were estimated using a grid search procedure. Distributions were fitted using truncated normal distributions (mean values and standard deviations were varied with a step size of 0.1 letter units). For launch sites close to the word center (e.g., Fig. 1, launch site = 3, 4), a bimodal fit was used to capture forward and backward refixation saccades (the same standard deviation was used for both saccade types). In our oculomotor model, the target word for each saccade was randomly selected according to the probabilities for word skipping and refixation as a function of word length. Next, the within-word landing position was drawn from the corresponding launch-site and word-length dependent distribution. For each sentence of the text corpus,  $N=1000$  runs were carried out to compute distributions of well-located and mislocated fixations positions (Fig. 2b), and the resulting fixation probabilities (Fig. 2c), as a function of word length. For each run, fixation probabilities were changed by half the deviation between simulated fixation probabilities and experimental values.

## RESULTS

The simulations started in step 0, where we used the experimentally observed skipping rates (Fig. 3a, black line) as the intended skipping rates (light blue). However, the numerical simulations showed that mislocated fixations strongly bias skipping probability as a function of word length in two ways. First, the realized saccade can undershoot the intended word (failed skipping) and, second, the saccade can overshoot the intended word (unintended skipping). In the simulations, failed skipplings (Fig. 3a, red line) turned out to be more frequent than unintended skipplings (green line). Therefore, over the full range of word lengths, realized skipping probabilities (dark blue line) are smaller than the values observed experimentally. To tackle this problem, our algorithm adjusted word-targeting probabilities in the next iteration, i.e., the algorithm increased the intended skipping probability for the next run of the oculomotor model.

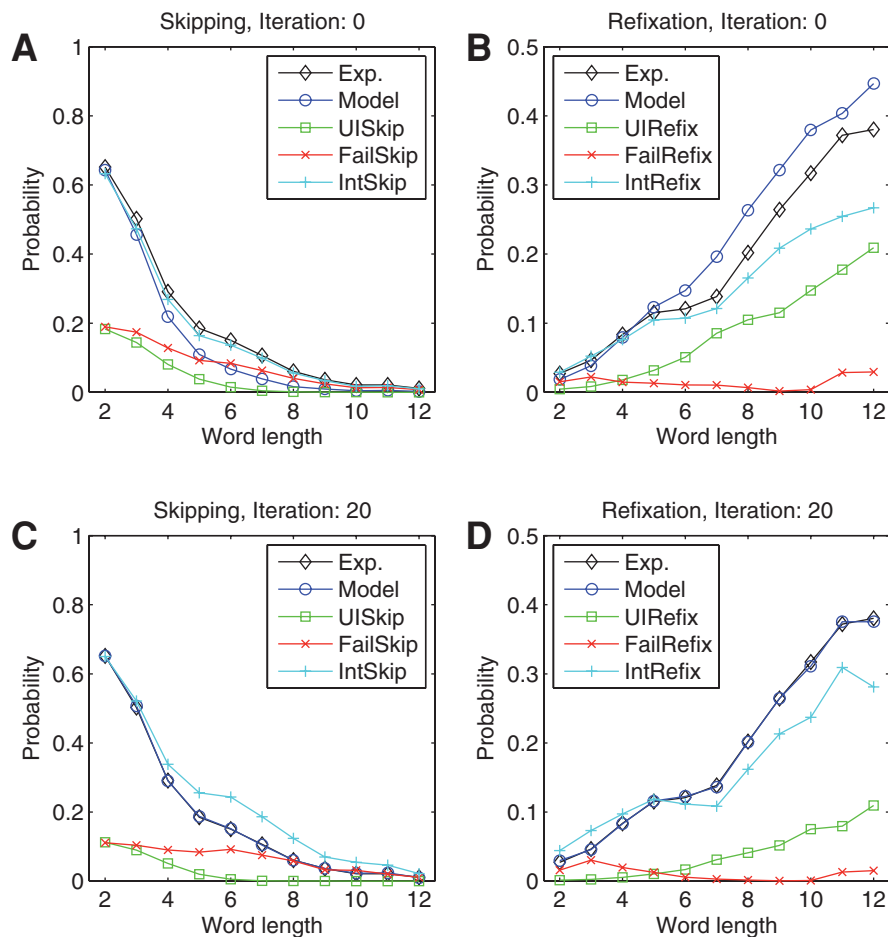

**Figure 3. Saccade targeting under the influence of oculomotor errors.** Mislocated fixations generate deviations between intended (light blue) and simulated (dark blue) fixation probabilities for word skipplings (A,C) and refixations (B,D). After 20 iterations, probabilities for both types of saccades converged to the experimentally observed values (black). (A,B) Iteration 0. (C,D) Iteration 20. doi:10.1371/journal.pone.0001534.g003

This iterative procedure converged after about 20 steps (Fig. 3). Convergence showed that self-consistent estimation of mislocated fixations was successful. As a result, the probabilities for *intended* word skipping (Fig. 3c, light blue line) turned out to be higher than suggested by the experimental data (black line) for medium-sized word lengths. For long words (>6 characters), failed skipping is the most important error type. For decreasing word length, however, we found an increasing amount of unintended skipplings. Because both errors types, i.e., unintended and failed skipplings, are comparable in number for short words (<5 characters), the number of intended skipplings equals the number of experimentally observed skipplings.

For refixations, a high rate of unintended refixations (Fig. 3b, green line) induced a higher refixation rate in the simulations than observed in the experimental data. After 20 iterations, however, the simulations suggested that the experimentally observed refixation probability (Fig. 3d, black line) can be decomposed into intended (light blue line) and unintended refixations (green line). Simultaneously to adjusting the fixation probabilities, our iterative procedure corrected the distributions of within-word landing positions by the amount of mislocated fixations (Fig. 1, red). As predicted, the resulting well-located landing position distributions are characterized by smaller variances (Fig. 2b). In the oculomotor model, this reduction of variance leads to a significantly reduced standard deviation of the random error component of saccades (Fig. 4a).

Given the experimental data (Fig. 1), we expected mislocated fixations to occur most frequently close to word edges. Iteration 0 was based on the assumption that all experimentally observed fixations are well-located. When landing position was normalized to one, we found that mislocated fixations occur frequently for relative landing positions smaller than 0.2 and/or for words consisting of less than 5 characters (Fig. 4b). Because our iterative procedure eliminated most of the variance of the curve across word lengths, proportions of mislocated fixations can be described by a single U-shaped curve for all word lengths (Fig. 4d) greater than three letters.

## DISCUSSION

Our results indicate that the most important saccadic error types during reading are failed skipplings and unintended refixations (Fig. 4c). Failed skipplings represent the most prominent type of misguided saccades on short words, while unintended refixations typically fall on long words. Both targeting errors result from the eyes' general tendency to undershoot the center of target words [1]. This undershoot tendency increases with increasing launch site distance: The further away the launch site (i.e., the more negative the launch site distance for inter-word saccades), the more the mean of the Gaussian landing position distribution is shifted to the left (Fig. 1). This systematic linear component of oculomotor

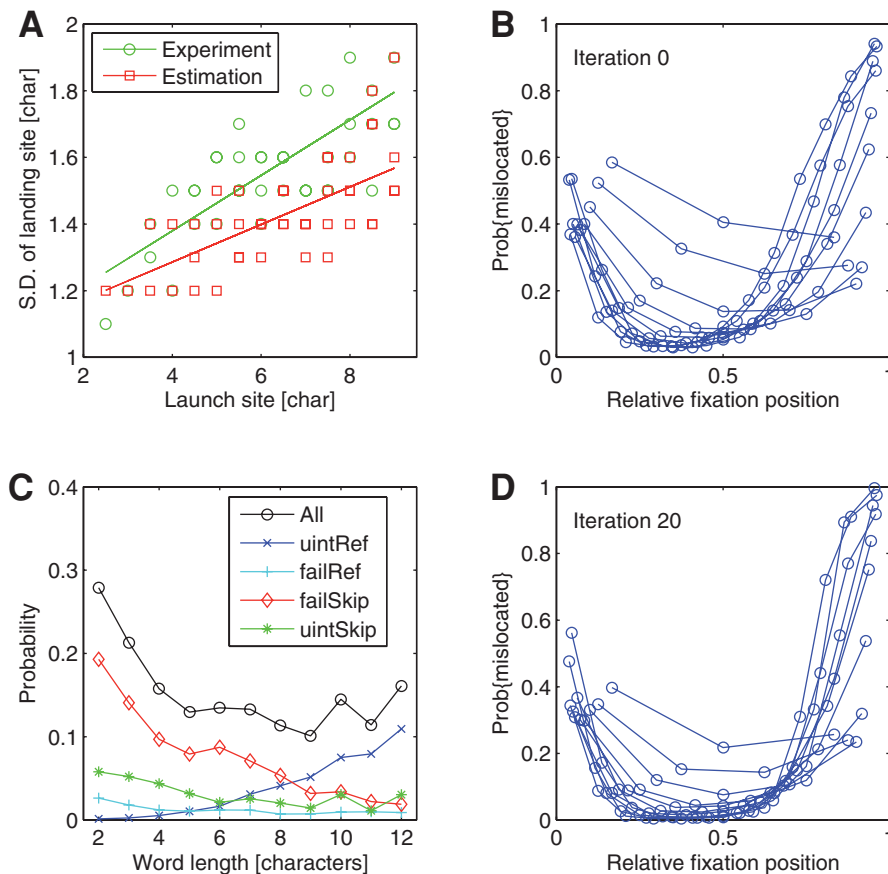

**Figure 4. Random component of saccade errors and probabilities of mislocated fixations.** (A) The random component of saccade errors is characterized by the standard deviation of the landing site distribution as a function of launch site distance. Distances are given as values from the *center* of the word. Best linear fits are also presented for experimental (green) vs. simulated (red) data. The reduced slope for the simulated data indicates the variance reduction achieved by our iterative estimation procedure. (B) Proportion of mislocated fixation as a function of relative fixation position for different word lengths (each curve represents a word length). For iteration 0, within-word distributions of mislocated fixations for word lengths 2 to 12 peak near word edges. (C) The overall probability of mislocated fixations (black) varies between about 10% and 30% for word lengths 2 to 12. For short to medium-sized words (<8 characters), failed skipplings represent the most frequently occurring case of mislocated fixations, while for long words (>8 characters) unintended refixations are most important. (D) After 20 iterations, the proportion of mislocated fixations can be approximated by a single U-shaped curved for all words with lengths greater than 5 characters.  
doi:10.1371/journal.pone.0001534.g004

error, the so-called landing position function, has been explained in terms of a saccadic range error (SRE, [3]). The slope of the landing position function reflects the strength of the SRE. The observed experimental suggest a slope of 0.46, i.e., for each one-letter increment in (center-based) launch site distance, the mean of the landing position distribution is shifted by about half a letter. Different from this well-established finding [3], our simulations showed that this slope is reduced substantially to a value of 0.38 if empirical landing position data are corrected for mislocated fixations. Furthermore, we found a similar reduction of the slope from 0.63 to 0.45 for forward-refixation saccades. Thus, the present results are crucial for theoretical explanations of the landing position function in reading.

Why should our simple oculomotor model be adequate to investigate within-word landing positions and their impact on fixation probabilities in reading? The observation of Gaussian distributed fixation locations within words is a very robust phenomenon. There is somewhat controversial evidence as to whether cognition affects within-word landing positions. Based on well-controlled experiments, it was recently shown that orthographic familiarity and regularity influence landing positions [11–13]. In addition, earlier analyses of the present corpus reading data

showed a small but significant effect of word frequency on mean landing site: Readers landed somewhat further into the word when it was a high-frequency word as compared to a low-frequency word; however, this was true for 3- to 6-letter words only [14]. Importantly, if observed at all, effects of higher-level cognitive variables on fixation locations are small (typically less than half a character). Furthermore, we recently compared normal reading data with data from a *z*-string scanning condition, conceptualized as an oculomotor control condition to normal reading. Landing position distributions were remarkably similar in both conditions [15]. We therefore conclude that oculomotor activity determining within-word fixation locations is largely independent from ongoing word processing during reading.

In a recent review of theories on word skipping [16], it was argued that “any comprehensive model of word skipping has to take into account the existence of involuntary word skipping due to oculomotor error (as well as the fact that some words are involuntary looked at because of a saccade undershoot)” (p. 60). Our present analyses contribute to this line of research by showing that unintended skipplings due to saccadic overshoot are relatively rare (supporting an argument put forth by [17]). Rather, the impact of misguided saccades on skipping behavior predominantly

shows as failed skipplings, indicating that skipping probabilities as computed from experimentally observed data clearly underestimate the intended skipping probabilities, while the probability of intended refixations is overestimated from experimental data.

More generally, mislocated fixations represent an important source of error variance for conventional forms of analysis of eye-movement data. In perspective, our technique might be used to explain a significant proportion of this error variance in reading and other eye-movement tasks. Currently, there is an important debate on parafoveal-on-foveal in eye-movement research on reading. Because the word we are fixating on during a mislocated fixation may not necessarily be the word we are currently processing [5], parafoveal-on-foveal effects might partially be explained by mislocated fixations [18]. Our analysis proposed here is a promising approach to investigate the relation between mislocated fixation and parafoveal-on-foveal effects and to solve the controversy on parafoveal-on-foveal effects [19,20].

Finally, mislocated fixations are a challenge for models of eye-movement control (e.g., [21–23]). Any model of saccade generation must reproduce the pattern of mislocated fixations described here. In the SWIFT model of eye-movement control (see [7] for the latest implementation of the model), we assumed that a mislocated fixation triggers the immediate start of a potentially error-correcting saccade program, which leads to reduced fixation

durations for mislocated fixations. Such an assumption can explain the apparently paradoxical finding of an inverted-optimal viewing position effect in fixation durations [24]: An account based on visual acuity limitations would predict that fixation durations should be shortest around word centers, while experimentally fixation durations are longest at word centers. Because mislocated fixations are more likely near word boundaries, the immediate start of a new saccade program generates the inverted U-shape of fixation duration as a function of within-word fixation location [8,9,15]. From this perspective, mislocated fixations represent a major factor influencing eye guidance during reading and related visual-cognitive behavior [25].

## ACKNOWLEDGMENTS

This work is based on experimental data collected in a joint research project with Reinhold Kliegl. We thank Daniel Press and Keith Rayner for helpful comments.

## Author Contributions

Conceived and designed the experiments: RE AN. Performed the experiments: RE AN. Analyzed the data: RE AN. Contributed reagents/materials/analysis tools: RE AN. Wrote the paper: RE AN.

## REFERENCES

1. Rayner K (1998) Eye movements in reading and information processing: 20 years of research. *Psychol Bull* 124: 372–422.
2. Rayner K (1979) Eye guidance in reading: Fixation locations within words. *Perception* 8: 21–30.
3. McConkie GW, Kerr PW, Reddix MD, Zola D (1988) Eye movement control during reading: I. The locations of initial fixations on words. *Vision Res* 46: 245–253.
4. Deubel H, Schneider WX (1996) Saccade target selection and object recognition: Evidence for a common attentional mechanism. *Vision Res* 36: 1827–1837.
5. Rayner K, Warren T, Juhasz BJ, Liversedge SP (2004) The effect of plausibility on eye movements in reading. *J Exp Psychol: Learn Mem Cogn* 6: 1290–1301.
6. Kliegl R, Nuthmann A, Engbert R (2006) Tracking the mind during reading: The influence of past, present, and future words on fixation durations. *J Exp Psychol: Gen* 135: 12–35.
7. Engbert R, Nuthmann A, Richter EM, Kliegl R (2005) SWIFT: A dynamical model of saccade generation during reading. *Psychol Rev* 112: 777–813.
8. Nuthmann A, Engbert R, Kliegl R (2005) Mislocated fixations during reading and the inverted optimal viewing position effect. *Vision Res* 45: 2201–2217.
9. Engbert R, Nuthmann A, Kliegl R (2007) An iterative algorithm for the estimation of the distribution of mislocated fixations during reading. In: van Gompel RPG, Fischer MH, Murray WS, Hill RL, eds. *Eye movements: A window on mind and brain*. Oxford: Elsevier Science. pp 319–337.
10. Kliegl R, Grabner E, Rolfs M, Engbert R (2004) Length, frequency, and predictability effects of words on eye movements in reading. *Eur J Cogn Psychol* 16: 262–284.
11. White SJ, Liversedge SP (2004) Orthographic familiarity influences initial eye fixation positions in reading. *Eur J Cogn Psychol* 16: 52–78.
12. White SJ, Liversedge SP (2006) Linguistic and nonlinguistic influences on the eyes' landing positions during reading. *Quart J Exp Psychol* 59: 760–782.
13. White SJ, Liversedge SP (2006) Foveal processing does not modulate non-foveal orthographic influences on fixation positions. *Vision Res* 46: 426–437.
14. Nuthmann A (2006) The “Where” and “When” of Eye Fixations in Reading, Unpublished Doctoral Dissertation, University of Potsdam, Germany (online available from <http://nbn-resolving.de/urn:nbn:de:kobv:517-opus-7931>).
15. Nuthmann A, Engbert R, Kliegl R (2007) The IOVP effect in mindless reading: Experiment and modeling. *Vision Res* 47: 990–1002.
16. Brysbaert M, Drieghe D, Vitu F (2005) Word skipping: Implications for theories of eye movement control in reading. In Underwood G, ed. *Cognitive processes in eye guidance*. Oxford: Elsevier Science. pp 53–77.
17. Binder KS, Pollatsek A, Rayner K (1999) Extraction of information to the left of the fixated word in reading. *J Exp Psychol: Hum Percept Perform* 25: 1162–1172.
18. Drieghe D, Rayner K, Pollatsek A (in press) Mislocated fixations can account for parafoveal-on-foveal effects in eye movements during reading. *Quart J Exp Psychol*. DOI: 10.1080/17470210701467953.
19. Rayner K, Pollatsek A, Drieghe D, Slattery TJ, Reichle ED (2007) Tracking the mind during reading via eye movements: Comments on Kliegl, Nuthmann, and Engbert (2006). *J Exp Psychol: Gen* 136: 520–529.
20. Kliegl R (2007) Toward a perceptual-span theory of distributed processing in reading: A reply to Rayner, Pollatsek, Drieghe, Slattery, and Reichle (2007). *J Exp Psychol: Gen* 136: 530–537.
21. Reichle ED, Pollatsek A, Fisher DL, Rayner K (1998) Toward a model of eye movement control during reading. *Psychol Rev* 105: 125–157.
22. Engbert R, Longtin A, Kliegl R (2002) A dynamical model of saccade generation in reading based on spatially distributed lexical processing. *Vision Res* 42: 621–636.
23. Reichle ED, Rayner K, Pollatsek A (2003) The E-Z Reader model of eye movement control in reading: Comparisons to other models. *Behav Brain Sci* 26: 446–526.
24. Vitu F, McConkie GW, Kerr P, O'Regan JK (2001) Fixation location effects on fixation durations during reading: An inverted optimal viewing position effect. *Vision Res* 41: 3513–3533.
25. Trukenbrod HA, Engbert R (2007) Oculomotor control in a sequential search task. *Vision Res* 47: 2426–2443.
